# Supplementary material
Source: PubMed Central journal article supplement (PMC3043800)

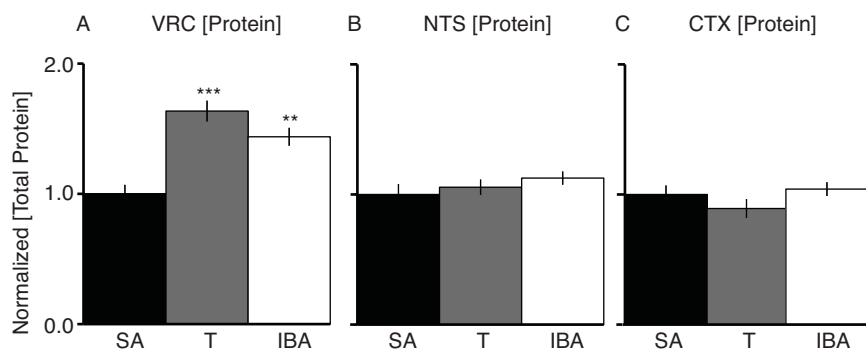

Supplement: supp_00607.2010_figS1.pdf [file supp_00607.2010_figS1.pdf]

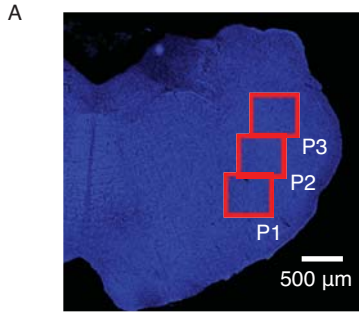

Colabel Cell Distribution

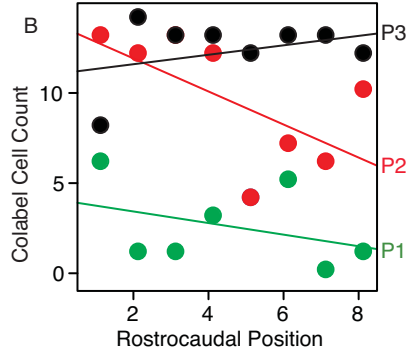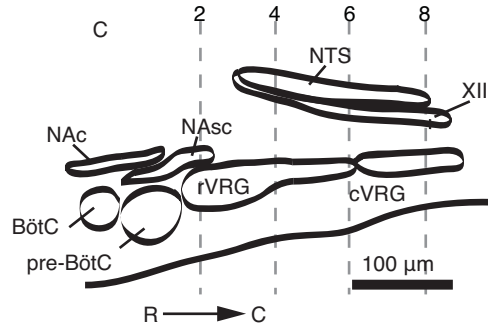

Supplement: supp_00607.2010_figS2.pdf [file supp_00607.2010_figS2.pdf]
